# Supplementary material for: Platyphylloside Isolated from Betula platyphylla is Antiproliferative and Induces Apoptosis in Colon Cancer and Leukemic Cells
Source: MDPI journal article supplement (doi:10.3390/molecules24162960), 2019-08-15
Supplement: s1 [file s1]

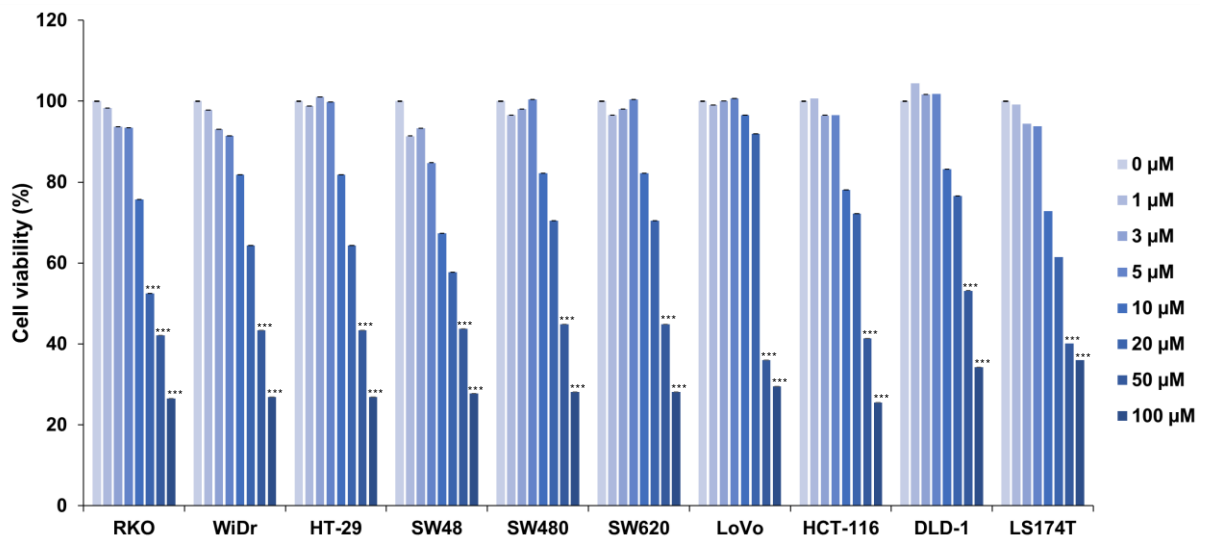

**Figure S1.** BPP showed anti-proliferative effect on various colon cancer cells. Cell viability was determined using the MTS assay post treatment with compound.

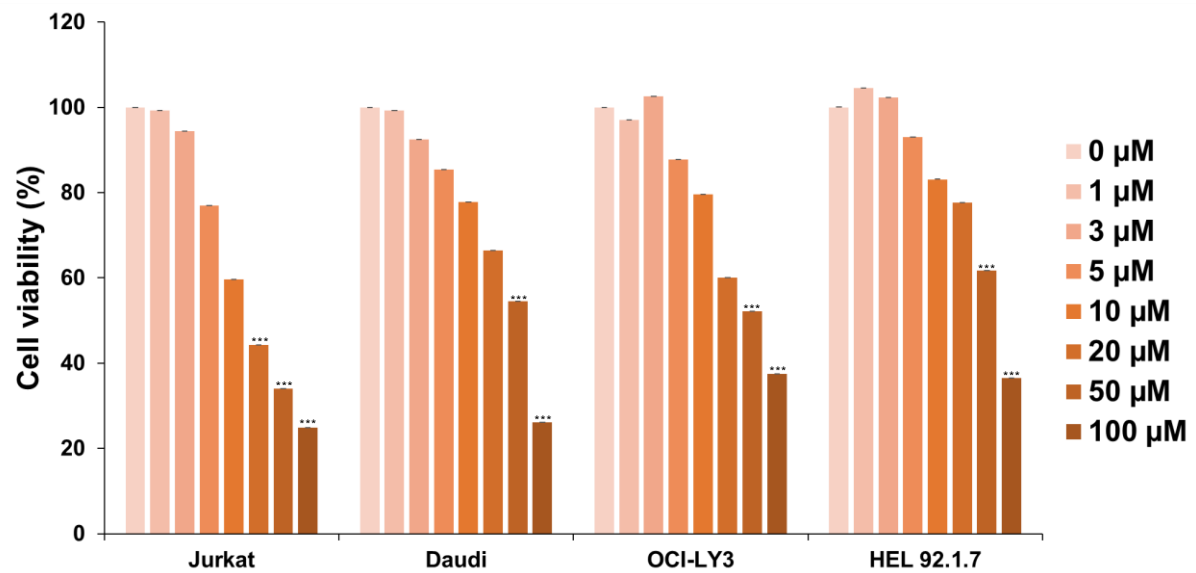

**Figure S2.** BPP showed anti-proliferative effect on various leukemia cells. Cell viability was determined using the MTS assay post treatment with compound.
